# Supplementary material
Source: PubMed Central journal article supplement (PMC7719084)
Supplement: NIHMS1645396-supplement-1.pdf [file NIHMS1645396-supplement-1.pdf]

| <b>Number</b> | <b>Sex</b> | <b>Age</b> | <b>Diagnosis</b>                                   | <b>Proteinuria</b> |
|---------------|------------|------------|----------------------------------------------------|--------------------|
| E-181-14      | M          | 22         | Control - Pre-transplant biopsy                    | -                  |
| E-116-14      | M          | 23         | Control - Pre-transplant biopsy                    | -                  |
| E-11-14       | F          | 45         | Control - Pre-transplant biopsy                    | -                  |
| E-21-16       | M          | 32         | FSGS - Perihilar and undertermined with hyalinosis | 2.5 g/day          |
| E-11-16       | M          | 18         | FSGS - Undertermined                               | 7.0 g/day          |
| E-17-19       | F          | 45         | FSGS - Perihilar and peripheral                    | unavailable        |
| E-276-12      | F          | 28         | FSGS - NOS (tip and perihilar)                     | 2.5 g/day          |
| E-13-14       | F          | 43         | FSGS - Tip sclerosing                              | 12 g/day           |

## Supplementary Figure 1

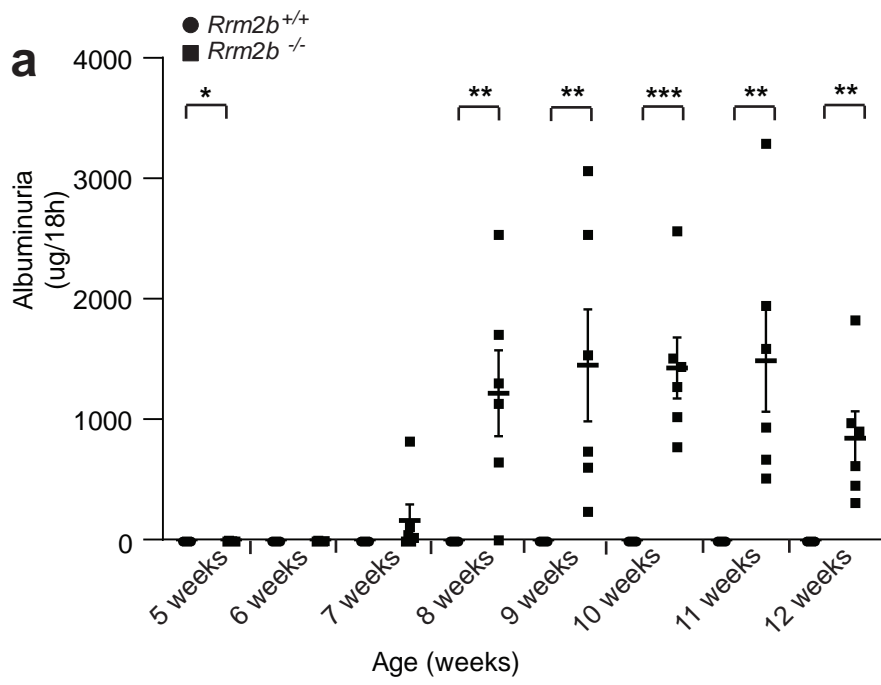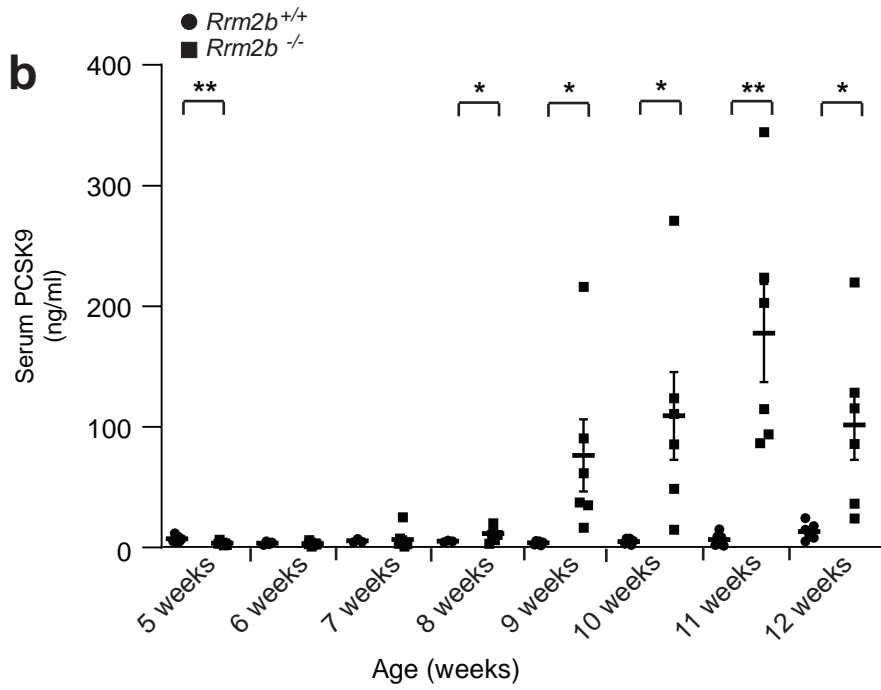

**Supplementary Figure 2**

5 weeks

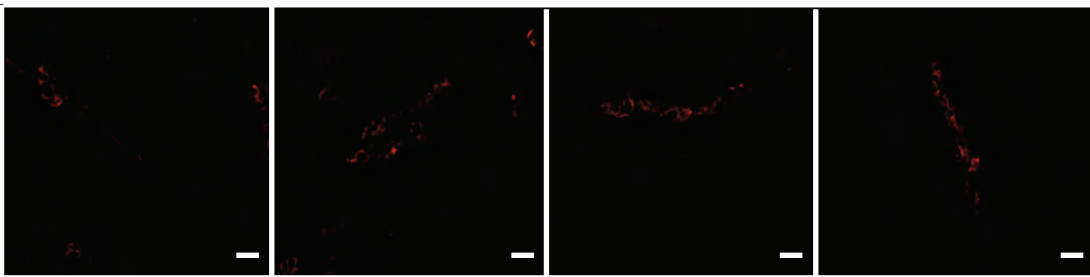

6 weeks

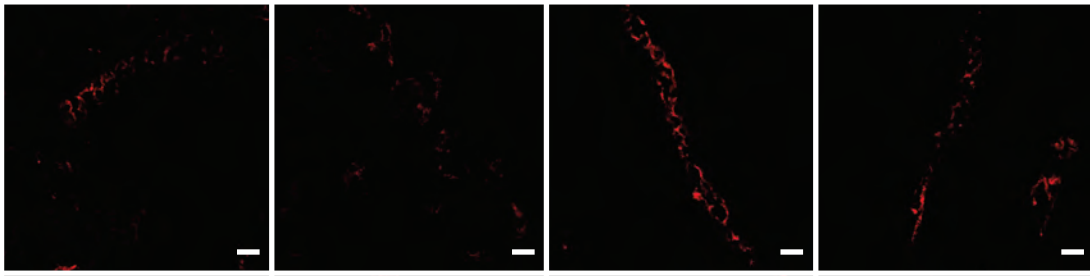

7 weeks

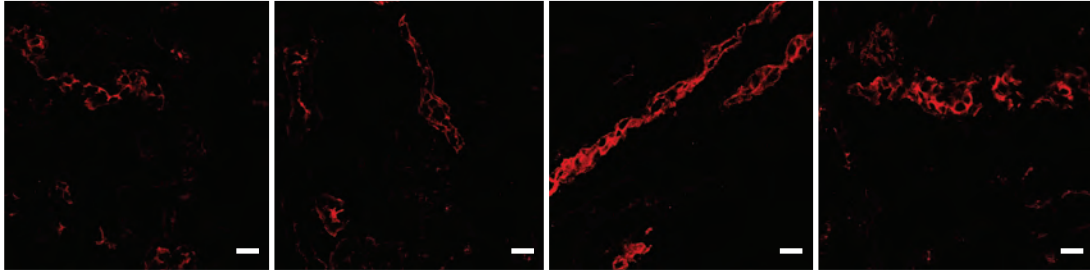

8 weeks

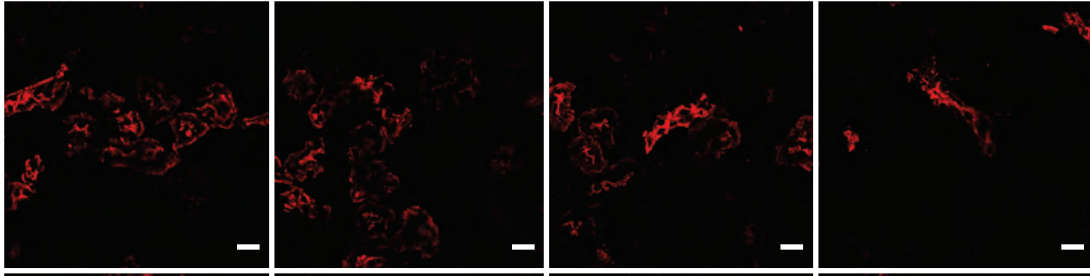

9 weeks

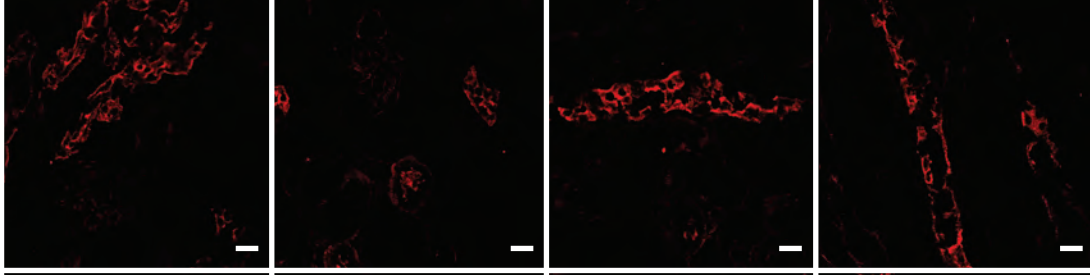

10 weeks

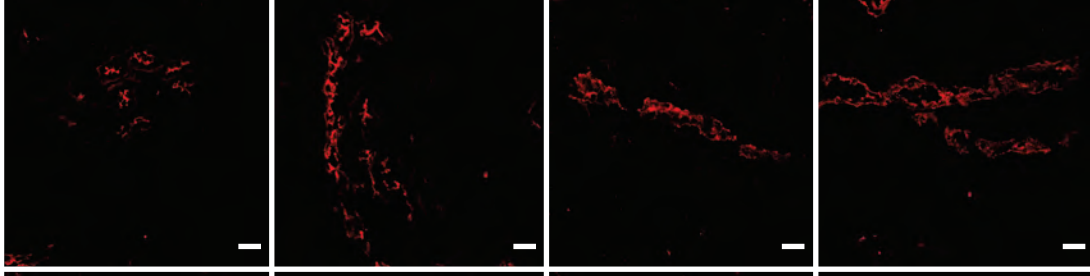

11 weeks

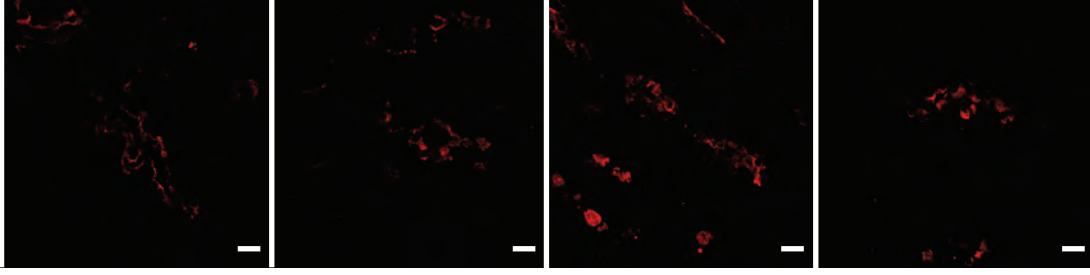

**Supplementary Figure 3**

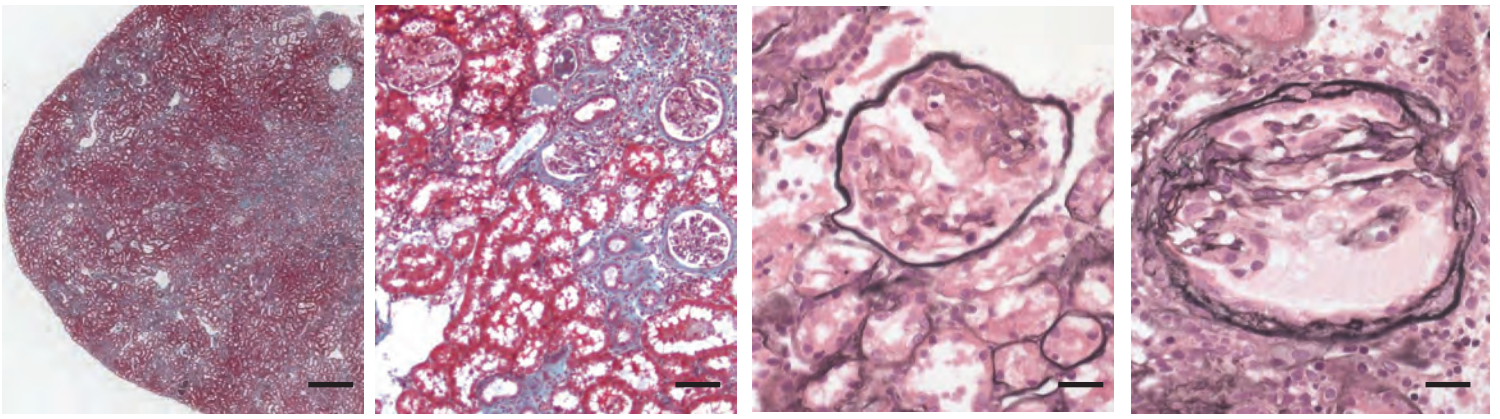

**Supplementary Figure 4**

**a**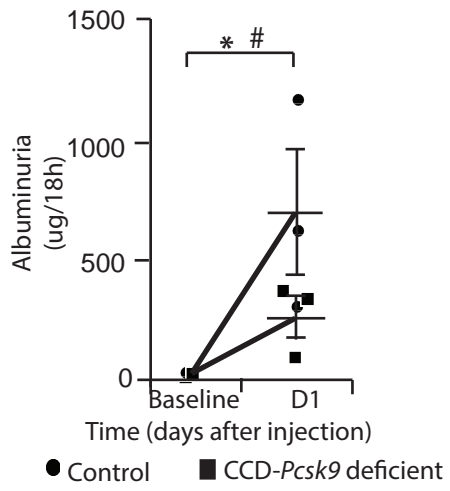**b**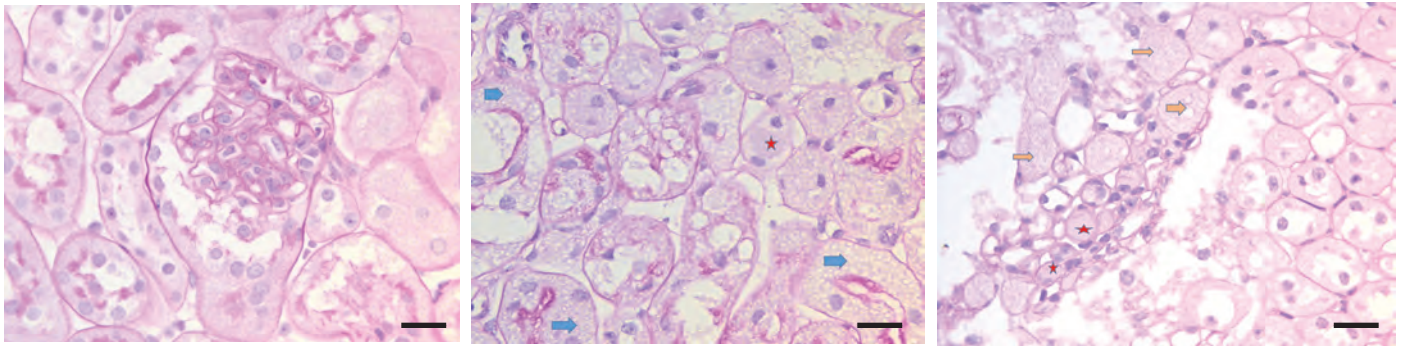

Control mouse

CCD-*Pcsk9* deficient mice**Supplementary Figure 5**

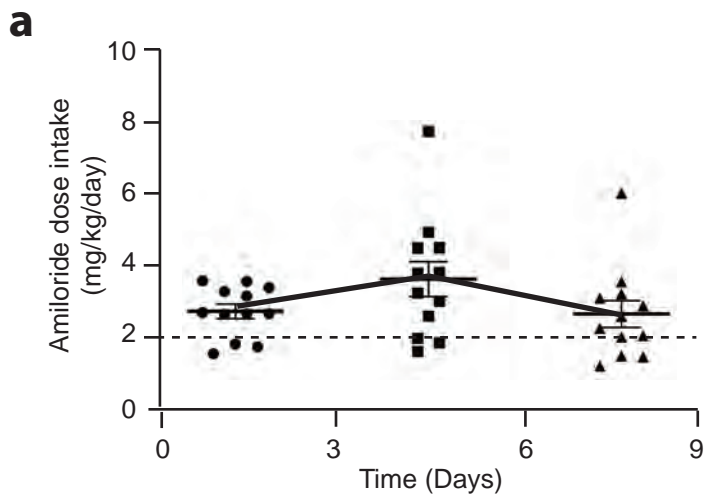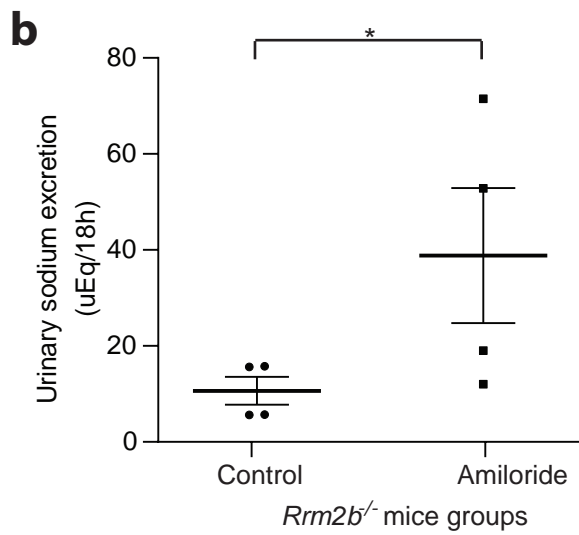

**Supplementary Figure 6**
